# Supplementary material for: Diversity and Functionality of Culturable Endophytic Bacterial Communities in Chickpea Plants
Source: PubMed Central journal article supplement (PMC6409739; doi:10.3390/plants8020042), 2019-02-14
Supplement: plants-08-00042-s001.pdf [file plants-08-00042-s001.pdf]

**Table S1.** Results obtained for cellulase activity, IAA synthesis, siderophore and ammonia production, phosphate solubilization and antifungal activity. (–) no production or activity; (+) low production; (++) high production; (+++) very high production; nd- not determined. Maximum salt and manganese concentration tolerated and genus based on partial 16S rRNA gene sequence for each endophytic bacterial strain.

| Strain | IAA production [µg/ml] | Cellulase production | Siderophore production | Phosphate solubilization | Ammonia production | Antifungal activity | Maximun NaCl concentration tolerated [%] | Maximun Mn concentration tolerated [mM] | Genus / Species affiliation  | GenBank accession number |
|--------|------------------------|----------------------|------------------------|--------------------------|--------------------|---------------------|------------------------------------------|-----------------------------------------|------------------------------|--------------------------|
| BI-1   | 57.0                   | –                    | no                     | no                       | yes                | no                  | 7.5                                      | 5.0                                     | <i>Pantoea</i> sp.           | MH055461                 |
| BI-2   | 2.8                    | ++                   | yes                    | yes                      | yes                | no                  | 5.0                                      | 2.5                                     | <i>Bacillus</i> sp.          | MH055462                 |
| BI-3   | 1.6                    | +++                  | yes                    | yes                      | yes                | no                  | 10.0                                     | 2.5                                     | <i>Pseudomonas</i> sp.       | MH055463                 |
| BI-4   | 82.2                   | –                    | yes                    | no                       | yes                | no                  | 2.5                                      | 2.5                                     | <i>Bacillus acidiceler</i>   | MH055464                 |
| BI-5   | 88.9                   | ++                   | no                     | yes                      | no                 | no                  | 5.0                                      | 5.0                                     | <i>Enterobacter</i> sp.      | MH055465                 |
| BI-6   | 7.2                    | ++                   | yes                    | no                       | yes                | no                  | 2.5                                      | 2.5                                     | <i>Bacillus</i> sp.          | MH055466                 |
| BNI-1  | 80.1                   | –                    | no                     | no                       | no                 | no                  | 7.5                                      | 2.5                                     | <i>Enterobacter</i> sp.      | MH055467                 |
| BNI-2  | 46.5                   | –                    | no                     | no                       | no                 | no                  | 7.5                                      | 2.5                                     | <i>Pantoea</i> sp.           | MH055468                 |
| BNI-3  | 0.1                    | ++                   | no                     | no                       | no                 | no                  | 2.5                                      | 2.5                                     | <i>Stenotrophomonas</i> sp.  | MH055469                 |
| BNI-4  | 44.9                   | –                    | no                     | no                       | yes                | no                  | 5.0                                      | 1.0                                     | <i>Enterobacter</i> sp.      | MH055470                 |
| BNI-5  | 16.6                   | –                    | yes                    | no                       | no                 | yes                 | 5.0                                      | 0.0                                     | <i>Paenibacillus</i> sp.     | MH055471                 |
| BNI-6  | 2.6                    | –                    | no                     | no                       | yes                | no                  | 10.0                                     | 0.0                                     | <i>Pseudomonas</i> sp.       | MH055472                 |
| BNI-8  | 82.6                   | –                    | yes                    | no                       | yes                | no                  | 5.0                                      | 2.5                                     | <i>Enterobacter</i> sp.      | MH055473                 |
| BNI-9  | 73.4                   | –                    | no                     | no                       | yes                | no                  | 7.5                                      | 2.5                                     | <i>Enterobacter</i> sp.      | MH055474                 |
| BNI-10 | 0.0                    | –                    | no                     | no                       | no                 | no                  | 2.5                                      | 0.1                                     | <i>Bacillus</i> sp.          | MH055475                 |
| BNI-11 | 0.0                    | –                    | no                     | no                       | yes                | no                  | 10.0                                     | 0.5                                     | <i>Bacillus</i> sp.          | MH055476                 |
| BNI-12 | 70.2                   | –                    | no                     | no                       | yes                | nd                  | 5.0                                      | 0.5                                     | <i>Enterobacter</i> sp.      | MH055477                 |
| CI-1   | 88.0                   | –                    | no                     | no                       | no                 | no                  | 5.0                                      | 0.5                                     | <i>Enterobacter ludwigii</i> | MH055478                 |
| CI-2   | 2.1                    | +                    | yes                    | no                       | yes                | yes                 | 2.5                                      | 0.1                                     | <i>Pseudomonas protegens</i> | MH055479                 |
| CI-3   | 4.3                    | +                    | no                     | yes                      | yes                | no                  | 7.5                                      | 0.5                                     | <i>Klebsiella</i> sp.        | MH055480                 |

|               |      |    |     |     |     |     |      |      |                                                         |          |
|---------------|------|----|-----|-----|-----|-----|------|------|---------------------------------------------------------|----------|
| <b>CI-4</b>   | 87.4 | –  | yes | no  | no  | no  | 5.0  | 0.5  | <i>Enterobacter</i> sp.                                 | MH055481 |
| <b>CI-5</b>   | 50.8 | –  | no  | yes | yes | no  | 7.5  | 0.5  | <i>Enterobacter ludwigii</i>                            | MH055482 |
| <b>CI-6</b>   | 88.2 | –  | no  | no  | yes | no  | 2.5  | 2.5  | <i>Enterobacter</i> sp.                                 | MH055483 |
| <b>CI-7</b>   | 21.3 | +  | no  | no  | yes | no  | 2.5  | 0.25 | <i>Stenotrophomonas</i> sp.                             | MH055484 |
| <b>CI-8</b>   | 64.1 | –  | no  | yes | yes | no  | 5.0  | 0.5  | <i>Enterobacter ludwigii</i>                            | MH055485 |
| <b>CI-9</b>   | 86.6 | –  | no  | yes | no  | no  | 5.0  | 5.0  | <i>Enterobacter ludwigii</i>                            | MH055486 |
| <b>CI-10</b>  | 5.8  | –  | yes | yes | no  | no  | 7.5  | 5.0  | <i>Staphylococcus saprophyticus</i> subsp. <i>bovis</i> | MH055487 |
| <b>CI-11</b>  | 0.6  | –  | no  | no  | yes | no  | 1.0  | 0.25 | <i>Pseudomonas</i> sp.                                  | MH055488 |
| <b>CI-12</b>  | 0.0  | +  | no  | no  | yes | no  | 2.5  | 0.1  | <i>Microbacterium</i> sp.                               | MH055489 |
| <b>CNI-1</b>  | 9.0  | +  | no  | no  | yes | no  | 2.5  | 0.5  | <i>Pseudomonas</i> sp.                                  | MH055490 |
| <b>CNI-2</b>  | 0.1  | –  | no  | no  | no  | yes | 10.0 | 0.25 | <i>Stenotrophomonas</i> sp.                             | MH055491 |
| <b>CNI-3</b>  | 4.8  | ++ | yes | no  | yes | yes | 2.5  | 2.5  | <i>Pseudomonas koreensis</i>                            | MH055492 |
| <b>CNI-4</b>  | 4.7  | –  | yes | no  | yes | yes | 10.0 | 0.1  | <i>Pseudomonas koreensis</i>                            | MH055493 |
| <b>CNI-5</b>  | 6.4  | ++ | no  | no  | yes | nd  | 2.5  | 0.0  | <i>Pseudomonas</i> sp.                                  | MH055494 |
| <b>CNI-6</b>  | 0.4  | –  | yes | no  | yes | no  | 5.0  | 5.0  | <i>Enterobacter</i> sp.                                 | MH055495 |
| <b>CNI-7</b>  | 0.4  | –  | no  | no  | yes | no  | 7.5  | 0.1  | <i>Pseudomonas paralactis</i>                           | MH055496 |
| <b>CNI-8</b>  | 8.3  | +  | no  | no  | yes | no  | 2.5  | 0.1  | <i>Pseudomonas</i> sp.                                  | MH055497 |
| <b>CNI-9</b>  | 34.3 | ++ | yes | no  | yes | no  | 10.0 | 0.0  | <i>Microbacterium</i> sp.                               | MH055498 |
| <b>CNI-10</b> | 65.7 | –  | yes | no  | yes | nd  | 5.0  | 5.0  | <i>Enterobacter</i> sp.                                 | MH055499 |

|            |      |     |     |     |     |     |      |      |                                                              |          |
|------------|------|-----|-----|-----|-----|-----|------|------|--------------------------------------------------------------|----------|
| <b>GX1</b> | 6.7  | –   | nd  | nd  | no  | no  | 0.0  | 5.0  | <i>Paenibacillus</i> sp.                                     | MH055500 |
| <b>GX2</b> | 1.1  | –   | no  | no  | yes | no  | 5.0  | 0.5  | <i>Pantoea</i> sp.                                           | MH055501 |
| <b>GX3</b> | 0.0  | +++ | yes | no  | no  | no  | 5.0  | 2.5  | <i>Paenibacillus</i> sp.                                     | MH055502 |
| <b>GX4</b> | 0.1  | –   | no  | yes | no  | no  | 7.5  | 0.5  | <i>Leifsonia soli</i>                                        | MH055503 |
| <b>GX5</b> | 3.5  | –   | nd  | nd  | yes | no  | 0.0  | 0.5  | <i>Bacillus</i> sp.                                          | MH055504 |
| <b>GX6</b> | 2.2  | –   | no  | no  | yes | no  | 10.0 | 5.0  | <i>Bacillus</i> sp.                                          | MH055505 |
| <b>MH1</b> | 29.4 | +   | yes | no  | yes | no  | 7.5  | 0.5  | <i>Pantoea</i> sp.                                           | MH055506 |
| <b>MH2</b> | 1.0  | –   | no  | no  | yes | yes | 2.5  | 0.5  | <i>Pseudomonas protegens</i>                                 | MH055507 |
| <b>MH3</b> | 78.9 | –   | yes | no  | yes | no  | 7.5  | 0.5  | <i>Enterobacter</i> sp.                                      | MH055508 |
| <b>MH4</b> | 4.1  | –   | no  | no  | yes | yes | 7.5  | 5.0  | <i>Bacillus</i> sp.                                          | MH055509 |
| <b>MH5</b> | 45.7 | +   | yes | yes | yes | no  | 5.0  | 1.0  | <i>Kosakonia</i> sp.                                         | MH055510 |
| <b>MH6</b> | 6.3  | –   | no  | no  | yes | no  | 5.0  | 0.5  | <i>Pseudomonas</i> sp.                                       | MH055511 |
| <b>MP1</b> | 14.3 | –   | yes | no  | no  | no  | 2.5  | 0.5  | <i>Rhizobium</i> sp.                                         | MH055512 |
| <b>MP2</b> | 5.4  | –   | no  | no  | yes | no  | 10.0 | 0.25 | <i>Stenotrophomonas</i> sp.                                  | MH055513 |
| <b>MP3</b> | 2.6  | +++ | no  | no  | no  | no  | 2.5  | 0.1  | <i>Paenibacillus</i> sp.                                     | MH055514 |
| <b>MP4</b> | 88.1 | –   | no  | no  | yes | no  | 5.0  | 0.5  | <i>Enterobacter ludwigii</i>                                 | MH055515 |
| <b>MP5</b> | 3.7  | ++  | no  | no  | no  | no  | 2.5  | 2.5  | <i>Bacillus</i> sp.                                          | MH055516 |
| <b>MP6</b> | 4.9  | –   | no  | no  | yes | no  | 2.5  | 0.25 | <i>Stenotrophomonas</i> sp.                                  | MH055517 |
| <b>MP7</b> | 7.0  | +   | no  | no  | no  | no  | 2.5  | 0.25 | <i>Pseudomonas brassicacearum</i> subsp. <i>neaurantiaca</i> | MH055518 |
| <b>MP8</b> | 1.0  | –   | no  | no  | yes | no  | 2.5  | 2.5  | <i>Stenotrophomonas</i> sp.                                  | MH055519 |
